# Supplementary material for: Feasibility and Diagnostic Accuracy of Saliva-Based SARS-CoV-2 Screening in Educational Settings and Children Aged <12 Years
Source: MDPI journal article supplement (doi:10.3390/diagnostics11101797), 2021-09-29
Supplement: s1 [file s1]

**Supplementary Table (S1):** Characteristics (age [years]; sex) of individuals recruited in the Patient Cohort (PC) used for sensitivity calculation (n = 49).

| Age | Sex (Male, Female) | SAL | OPS |
|-----|--------------------|-----|-----|
| 25  | m                  | +   | +   |
| 49  | m                  | +   | +   |
| 68  | f                  | +   | +   |
| 21  | m                  | +   | +   |
| 50  | m                  | +   | +   |
| 57  | m                  | +   | +   |
| 22  | f                  | +   | +   |
| 30  | f                  | +   | +   |
| 24  | f                  | +   | +   |
| 47  | m                  | +   | +   |
| 53  | m                  | +   | +   |
| 71  | m                  | +   | +   |
| 32  | m                  | +   | +   |
| 22  | f                  | +   | +   |
| 32  | f                  | +   | +   |
| 46  | m                  | +   | +   |
| 62  | m                  | +   | +   |
| 73  | f                  | +   | +   |
| 57  | m                  | +   | +   |
| 14  | m                  | +   | +   |
| 31  | f                  | +   | +   |
| 39  | f                  | +   | +   |
| 22  | m                  | +   | +   |
| 33  | m                  | +   | +   |
| 70  | f                  | +   | +   |
| 87  | f                  | +   | +   |
| 68  | m                  | +   | +   |
| 35  | m                  | +   | +   |
| 79  | f                  | +   | +   |
| 46  | m                  | +   | +   |
| 25  | f                  | +   | +   |
| 46  | m                  | +   | +   |
| 3   | f                  | +   | +   |
| 79  | m                  | +   | +   |
| 16  | m                  | +   | +   |
| 24  | m                  | +   | +   |
| 8   | f                  | +   | +   |
| 50  | f                  | -   | +   |
| 70  | f                  | -   | +   |
| 57  | m                  | +   | -   |
| 72  | m                  | +   | -   |
| 6   | m                  | -   | -   |
| 23  | f                  | -   | -   |
| 55  | m                  | -   | -   |
| 65  | f                  | -   | -   |
| 44  | f                  | -   | -   |
| 28  | m                  | -   | -   |
| 79  | f                  | -   | -   |
| 74  | m                  | -   | -   |

**Abbreviations:** SAL: Salivette® (Saliva); OPS: oropharyngeal swab.
