# Supplementary material for: Feasibility and Diagnostic Accuracy of Saliva-Based SARS-CoV-2 Screening in Educational Settings and Children Aged <12 Years
Source: MDPI journal article supplement (doi:10.3390/diagnostics11101797), 2021-09-29
Supplement: s1 [file s1]

**Supplementary Table (S2):** Age [years] sex and Ct-values of corresponding gene loci included in the head-to-head analysis (n = 39).

| Age | Sex (Male, Female) | Ct-Value (SAL) | Ct-Value (OPS) |
|-----|--------------------|----------------|----------------|
| 25  | m                  | 20.94          | 24.94          |
| 49  | m                  | 21.68          | 15.3           |
| 68  | f                  | 23.01          | 28.21          |
| 21  | m                  | 23.37          | 32.10          |
| 50  | m                  | 24.29          | 29.46          |
| 57  | m                  | 24.97          | 23.26          |
| 22  | f                  | 25.03          | 27.9           |
| 30  | f                  | 25.13          | 20.05          |
| 24  | f                  | 25.23          | 19.43          |
| 47  | m                  | 25.48          | 15.29          |
| 53  | m                  | 26.09          | 16.34          |
| 6   | m                  | 27.48          | 20.51          |
| 71  | m                  | 27.59          | 32.11          |
| 32  | m                  | 28.17          | 26.6           |
| 22  | f                  | 28.54          | 21.24          |
| 32  | f                  | 28.72          | 18.45          |
| 46  | m                  | 28.89          | 19.28          |
| 35  | f                  | 29.47          | 20.99          |
| 62  | m                  | 29.79          | 32.58          |
| 73  | f                  | 29.79          | 32.7           |
| 57  | m                  | 29.95          | 19.74          |
| 14  | m                  | 29.96          | 28.33          |
| 31  | f                  | 30.41          | 27.42          |
| 39  | f                  | 30.62          | 23.06          |
| 22  | m                  | 31.29          | 25.88          |
| 33  | m                  | 31.39          | 21.9           |
| 70  | f                  | 31.67          | 20.47          |
| 87  | f                  | 31.73          | 29.05          |
| 68  | m                  | 31.81          | 29.9           |
| 35  | m                  | 31.92          | 19.87          |
| 79  | f                  | 32.07          | 23.86          |
| 46  | m                  | 32.34          | 26.74          |
| 25  | f                  | 33.97          | 27.68          |
| 46  | m                  | 34.78          | 28.17          |
| 3   | f                  | 35.19          | 34.67          |
| 79  | m                  | 36.3           | 33.97          |
| 16  | m                  | 25.30          | 17.45          |
| 24  | m                  | 33.23          | 26.01          |
| 8   | f                  | 35.78          | 27.36          |

**Abbreviations:** SAL: Salivette® (Saliva); OPS: oropharyngeal swab.
